# Supplementary material for: Bayesian calibration, process modeling and uncertainty quantification in biotechnology
Source: PubMed Central journal article supplement (PMC8939798; doi:10.1371/journal.pcbi.1009223), 2022-03-07

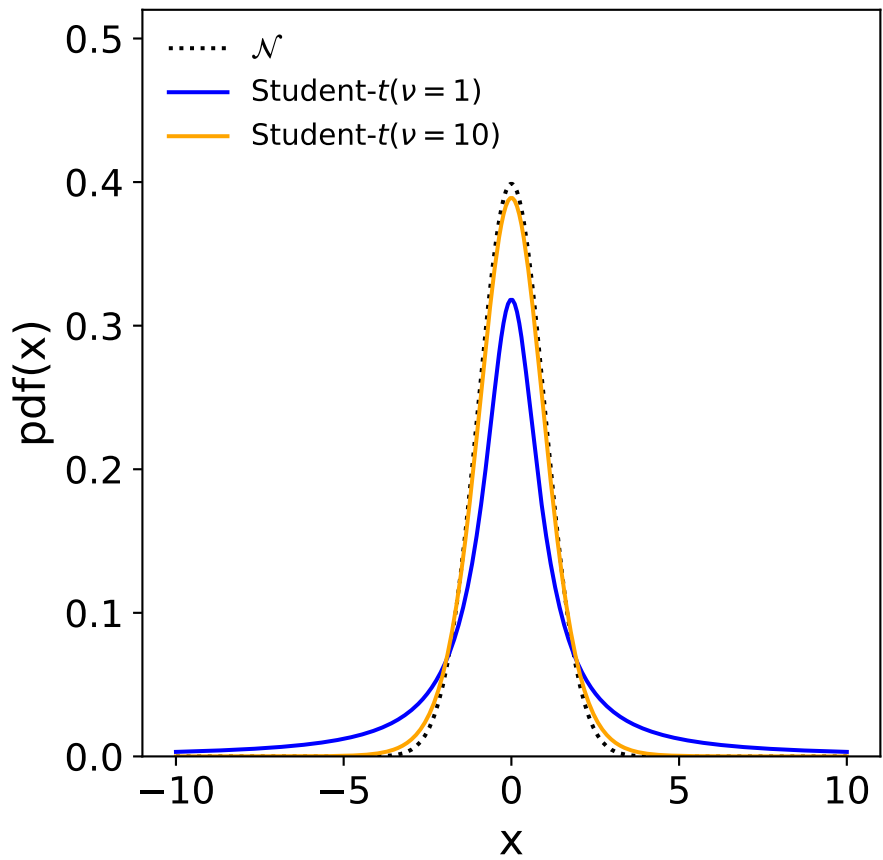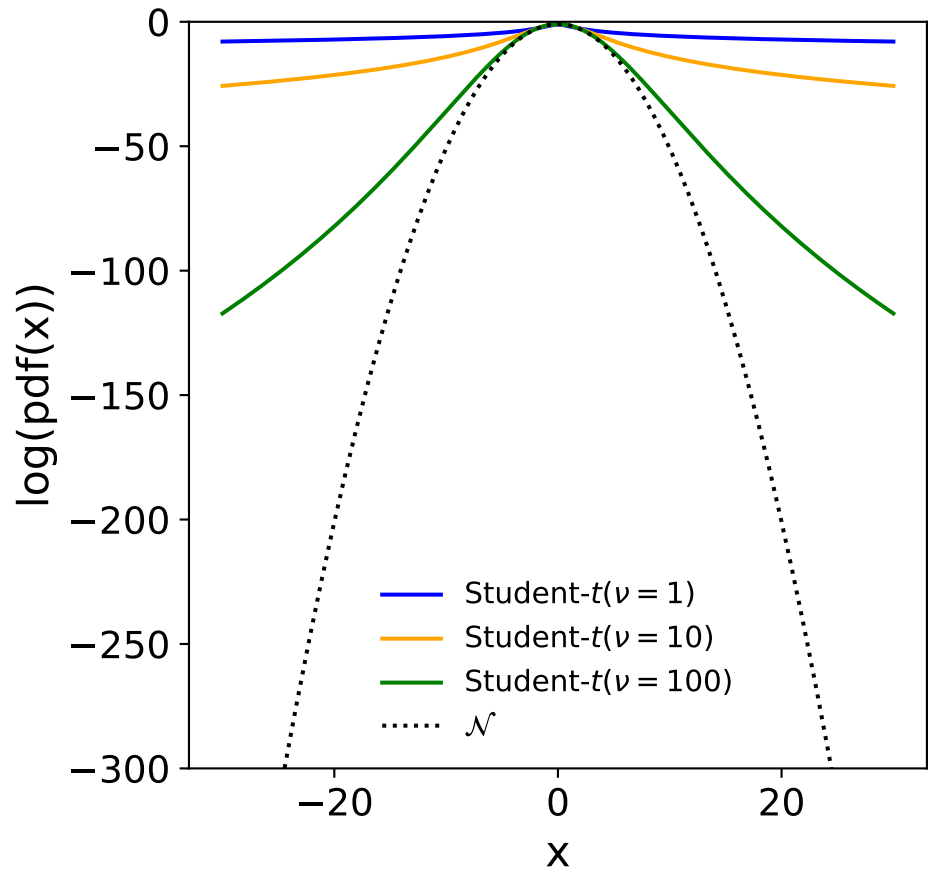

Supplement: pcbi.1009223.s001.pdf [file pcbi.1009223.s001.pdf]
