# Supplementary material for: Bayesian calibration, process modeling and uncertainty quantification in biotechnology
Source: PubMed Central journal article supplement (PMC8939798; doi:10.1371/journal.pcbi.1009223), 2022-03-07
Supplement: pcbi.1009223.s003.pdf [file pcbi.1009223.s003.pdf]

## Reparametrization of asymmetric logistic function

For simplicity of the reparameterization, the asymptote parameters  $L_L$  and  $L_U$  of the original Richard's Curve (Eq 1) can be omitted and substitutions  $b = -B$  and  $1/v = -e^{-c}$  were made such that all parameters may be real numbers (Eq 2).

$$f(x) = L_L + \frac{L_U - L_L}{(1 + e^{-B(m-x)})^{1/v}} \quad (1)$$

$$L_L, L_U, B, m \in \mathbb{R}$$

$$v \in \mathbb{R}_{>0}$$

In (3) the symmetry is already parametrized exactly as in the final result ((9)): As it increases, the inflection point  $I_y$  moves towards the upper limit. At  $c = 0$  it lies centered between the limits.

$$f(x) = \frac{1}{(1 + e^{-b(a-x)})e^{-c}} \quad (2)$$

$$a, b, c \in \mathcal{R}$$

In the following steps  $a$  and  $b$  are reparametrized in terms of the x-coordinate of the inflection point  $I_x$  and the slope  $S$  at the inflection point respectively.  $I_x$  was obtained by solving the second derivative of the  $a, b, c$  parametrization in Eq 2 for  $a$  in Eq 3:

$$f''(I_x) = 0$$

$$\Leftrightarrow I_x = a - \frac{c}{b} \quad (3)$$

$$\Leftrightarrow a = I_x + \frac{c}{b}$$

The slope parameter was obtained by substituting  $x$  in the first derivative of the  $a, b, c$  parametrization in Eq 2 with the analytical solution for  $I_x$  from Eq 3.

$$S = f'(I_x)$$

$$\Leftrightarrow S = b(e^c + 1)^{-1-e^{-c}} \quad (4)$$

Substituting  $a$  in Eq 2 with  $a(I_x, b, c)$  from Eq 3 yields a parametrization in terms of  $I_x, b, c$  (Eq 5):

$$f(x) = (e^{b(I_x - x + \frac{c}{b}) + 1})^{-e^{-c}} \quad (5)$$

$$I_x, b, c \in \mathcal{R}$$

For a parametrization in terms of both  $I_x$  and  $S$ , their equations from Eq 3 and Eq 4 must be solved for  $a$  and  $b$ :

$$a = \frac{I_x e^c}{e^c + 1} + \frac{I_x}{e^c + 1} + \frac{c(e^c + 1)^{-1-e^{-c}}}{S} \quad (6)$$

$$b = S(e^c + 1)^{(e^c + 1)e^{-c}}$$

A parametrization in terms of  $I_x, S, c$  is then obtained by substitution of  $a$  and  $b$  in Eq 2:

$$f(x) = (e^{(e^c+1)^{(e^c+1)e^{-c}} \cdot (I_x S - Sx + c(e^c+1)^{-(e^c+1)e^c})} + 1)^{-e^{-c}}$$

$$I_x, S, c \in \mathcal{R}$$
(7)

By common subexpression elimination Eq 7 simplifies to Eq 8.

$$f(x) = (e^{x_2 \cdot (I_x S - Sx + \frac{c}{x_2})} + 1)^{x_1}$$

$$x_0 = e^c + 1$$

$$x_1 = e^{-c}$$

$$x_2 = x_0^{x_1}$$

$$I_x, S, c \in \mathcal{R}$$
(8)

The final generalized parametrization in Eq 9 in terms of  $L_L, L_U, I_x, S, c$  was obtained by scaling slope parameter and function value with  $L_U - L_L$  and shifting by  $L_U$ .

$$f(x) = L_L + \frac{L_U - L_L}{(e^{s_2 \cdot (s_3 \cdot (I_x - x) + \frac{c}{s_2})} + 1)^{s_1}}$$

$$s_0 = e^c + 1$$

$$s_1 = e^{-c}$$

$$s_2 = s_0^{(s_0 \cdot s_1)}$$

$$s_3 = \frac{S}{L_U - L_L}$$

$$L_L, L_U, I_x, S, c \in \mathbb{R}$$
(9)

The corresponding Python implementation is shown in Code 1. For a step by step derivation of Eq 9, as well as its inverse using `sympy` we refer to the "Background Asymmetric Logsitc" Jupyter notebook in the `calibr8` repository [1].

### Code 1. Implementation of reparameterized asymmetric logistic function.

```
1 def asymmetric_logistic(x, theta):
2     """5-parameter asymmetric logistic model.
3
4     Parameters
5     -----
6     x : array-like
7         independent variable
8     theta : array-like
9         parameters of the logistic model
10         L_L: lower asymptote
11         L_U: upper asymptote
12         I_x: x-value at inflection point
13         S: slope at the inflection point
14         c: symmetry parameter (0 is symmetric)
15
16     Returns
17     -----
18     y : array-like
19         dependent variable
20     """
21     L_L, L_U, I_x, S, c = theta[:5]
22     # common subexpressions
23     s0 = numpy.exp(c) + 1
24     s1 = numpy.exp(-c)
25     s2 = s0 ** (s0 * s1)
26     # re-scale the inflection point slope with the interval
27     s3 = S / (L_U - L_L)
28
29     x = numpy.array(x)
30     y = (numpy.exp(s2 * (s3 * (I_x - x) + c / s2)) + 1) ** -s1
31     return L_L + (L_U-L_L) * y
```

## References

1. Osthege M, Helleckes L. JuBiotech/calibr8: v6.2.0; 2021. Available from: <https://doi.org/10.5281/zenodo.5721015>.
