# Supplementary material for: Bayesian calibration, process modeling and uncertainty quantification in biotechnology
Source: PubMed Central journal article supplement (PMC8939798; doi:10.1371/journal.pcbi.1009223), 2022-03-07
Supplement: pcbi.1009223.s006.pdf [file pcbi.1009223.s006.pdf]

## Process model parametrization

The parametrization of the batch cultivation process model was given by the tabular notation of a `murefi.ParameterMapping` in Table 1.

**Table 1. Parameter mapping for fitting of Monod kinetics.**

Repetitive rows were left out for clarity. The full length table has 28 rows.

| replicate | $S_0$ | $X_0$  | $\mu_{\max}$ | $K_S$ | $Y_{XS}$ |
|-----------|-------|--------|--------------|-------|----------|
| A02       | S0    | X0_A02 | mu_max       | 0.02  | Y_XS     |
| ...       | S0    | X0_... | mu_max       | 0.02  | Y_XS     |
| A08       | S0    | X0_A04 | mu_max       | 0.02  | Y_XS     |
| ...       | S0    | X0_... | mu_max       | 0.02  | Y_XS     |
| D08       | S0    | X0_D08 | mu_max       | 0.02  | Y_XS     |
